# Supplementary material for: A new family of boat-shaped Ln8 clusters exhibiting the magnetocaloric effect and slow magnetic relaxation
Source: Royal Society of Chemistry journal article supplement (doi:10.1039/d1dt02390j), 2021-01-01
Supplement: d1dt02390j1.pdf [file d1dt02390j1.pdf]

## Supporting Information

### **A New Family of Boat-Shaped Ln<sub>8</sub> Clusters Exhibiting Magnetocaloric Effect, Slow Magnetic Relaxation**

Jia-Nian Li,<sup>a</sup> Ning-Fang Li,<sup>a</sup> Ji-Lei Wang,<sup>a</sup> Xiao-Mei Liu,<sup>a</sup> Qing-Dong Ping,<sup>a</sup> Ting-Ting Zang,<sup>a</sup> Hua Mei\*<sup>a</sup> and Yan Xu\*<sup>a,b</sup>

<sup>a</sup>College of Chemical Engineering, State Key Laboratory of Materials-Oriented Chemical Engineering, Nanjing Tech University, Nanjing 211800, P. R. China

<sup>b</sup>State Key Laboratory of Coordination Chemistry, School of Chemistry and Chemical Engineering, Nanjing University, Nanjing 210023, P. R. China

## Luminescence Properties.

The luminescence properties of **3-Eu** were investigated in the solid state at ambient temperature. As can be seen in Fig. S1, under the maximum excitation wavelength of 394 nm, the **3-Eu** exhibits the characteristic emission peaks of Eu(III) cation. The **3-Eu** exhibits the characteristic emission peaks of Eu(III) at 580, 593, 613, 653, and 702 nm, which can be derived from  $^5D_0 \rightarrow ^7F_J$  ( $J = 0, 1, 2, 3,$  and  $4$ ) transitions. Among them, the strong emission at 613 nm is ascribed to the  $^5D_0 \rightarrow ^7F_2$  electric dipolar transition, while the medium emission at 593 nm is attributed to magnetic dipolar  $^5D_0 \rightarrow ^7F_1$  transition. Additionally, the peaks at 653 and 702 nm pertain to the transition of  $^5D_0 \rightarrow ^7F_3$  and  $^5D_0 \rightarrow ^7F_4$ , respectively. Those characteristic peaks are in agreement with the reported Eu(III) compounds.<sup>1,2</sup>

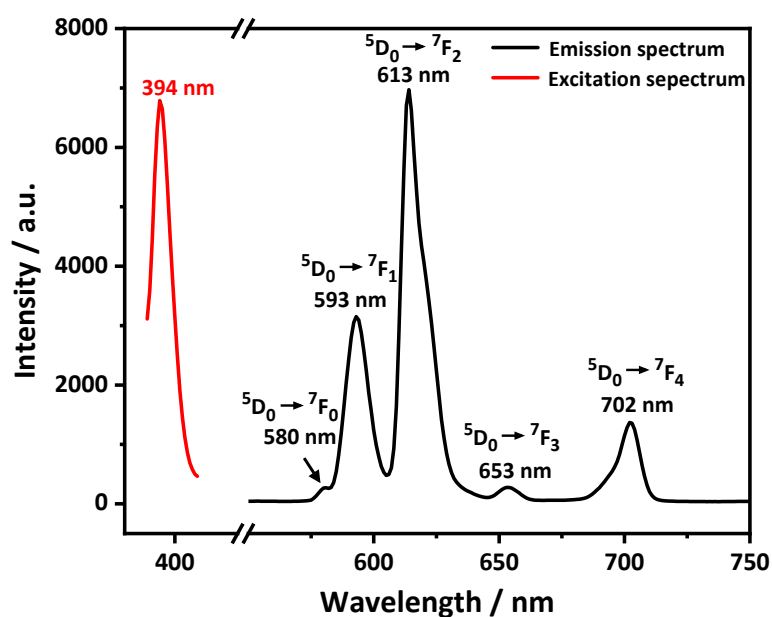

**Fig. S1** The solid-state excitation and emission spectra of the powder samples of **3-Eu** under room temperature.

## Experimental Section

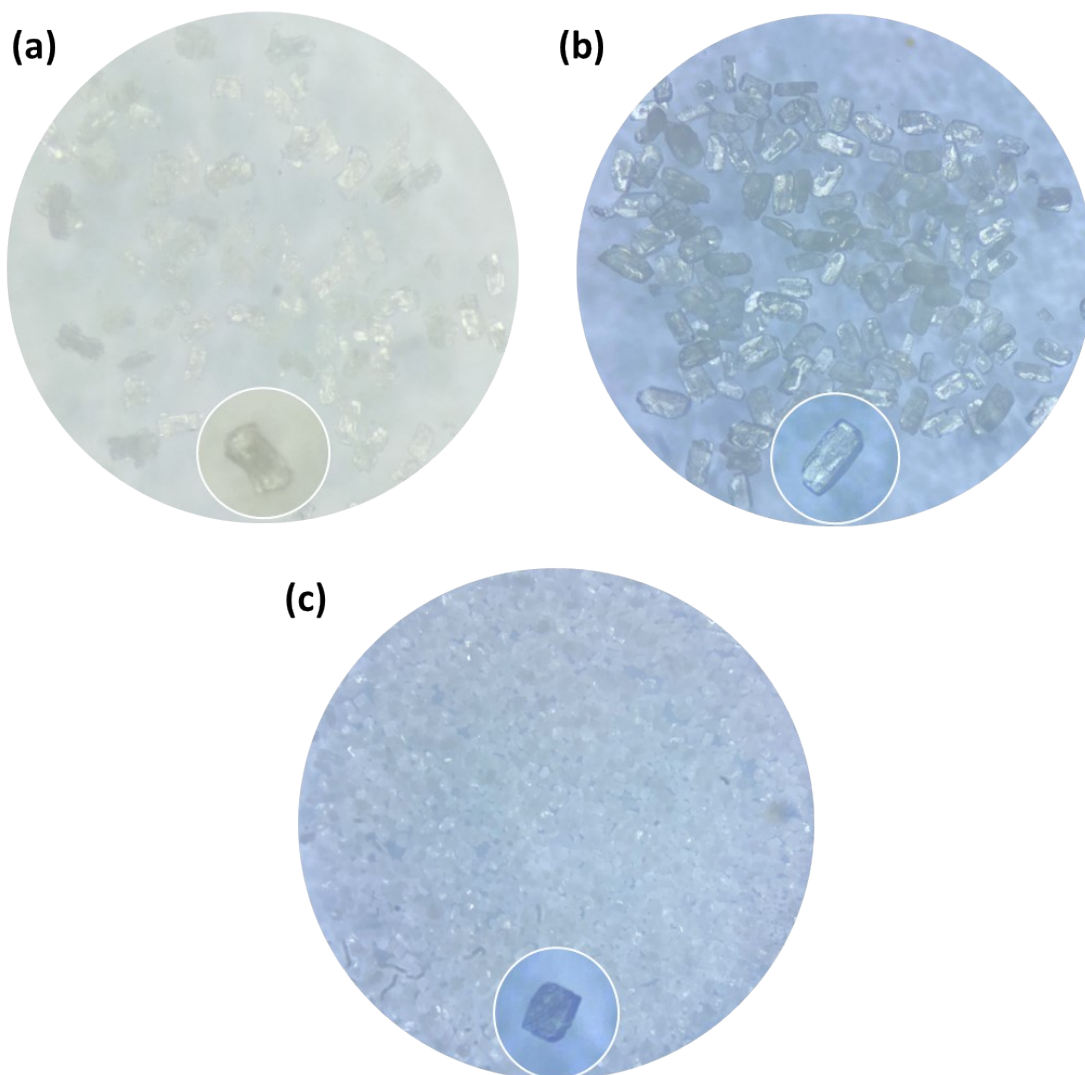

**Fig. S2** The images of (a) **1-Gd**, (b) **2-Dy**, (c) **3-Eu** under optical microscope.

## Structure

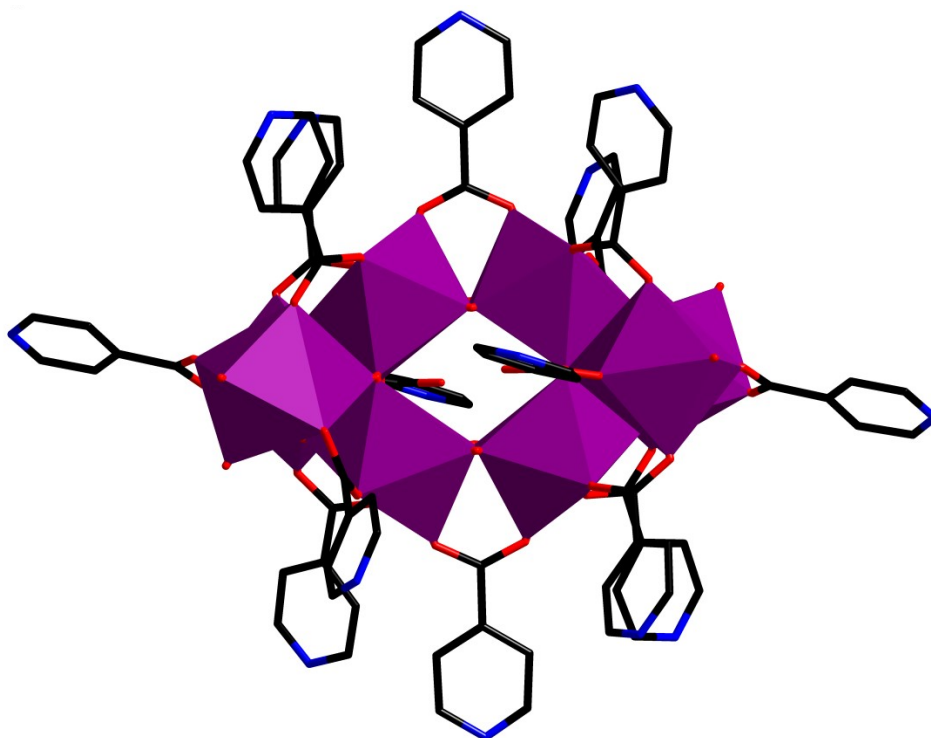

Fig. S3 Polyhedral view of compound 2-Dy.

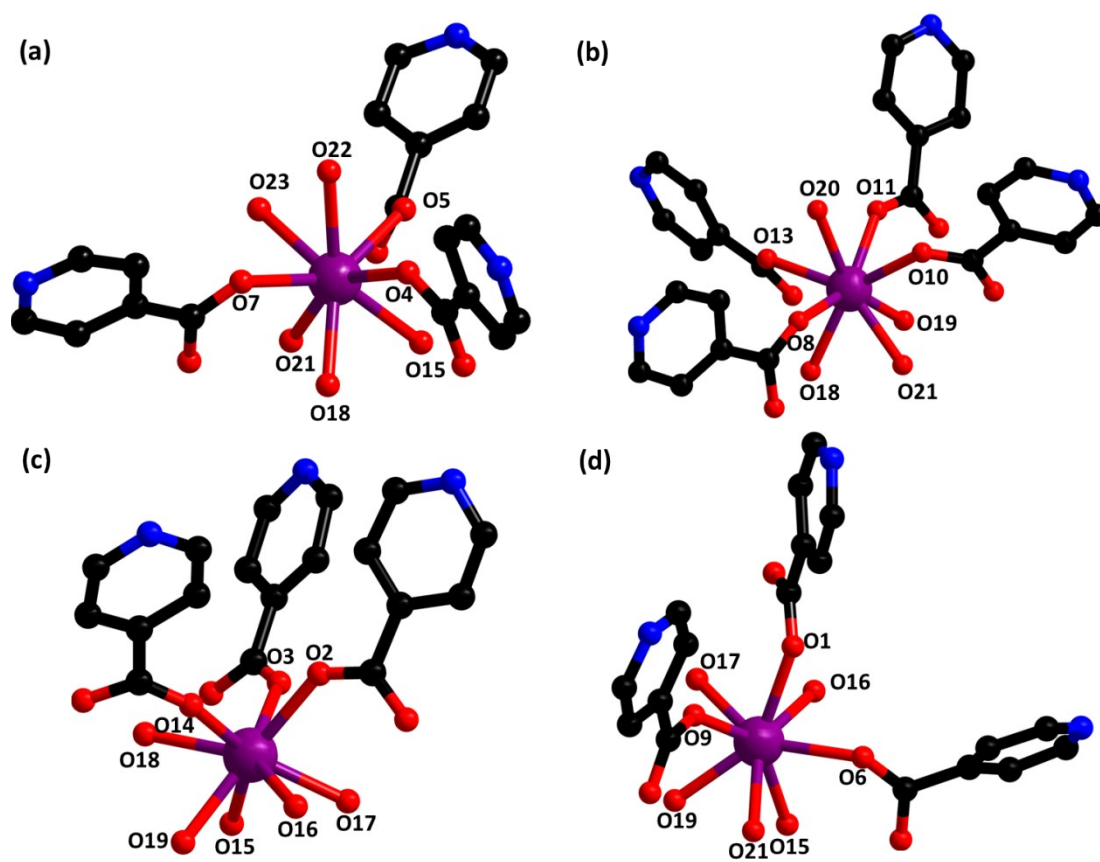

Fig. S4 Ball-and-stick of coordination mode of Dy1 (a), Dy2 (b), Dy3 (c), Dy4 (d).

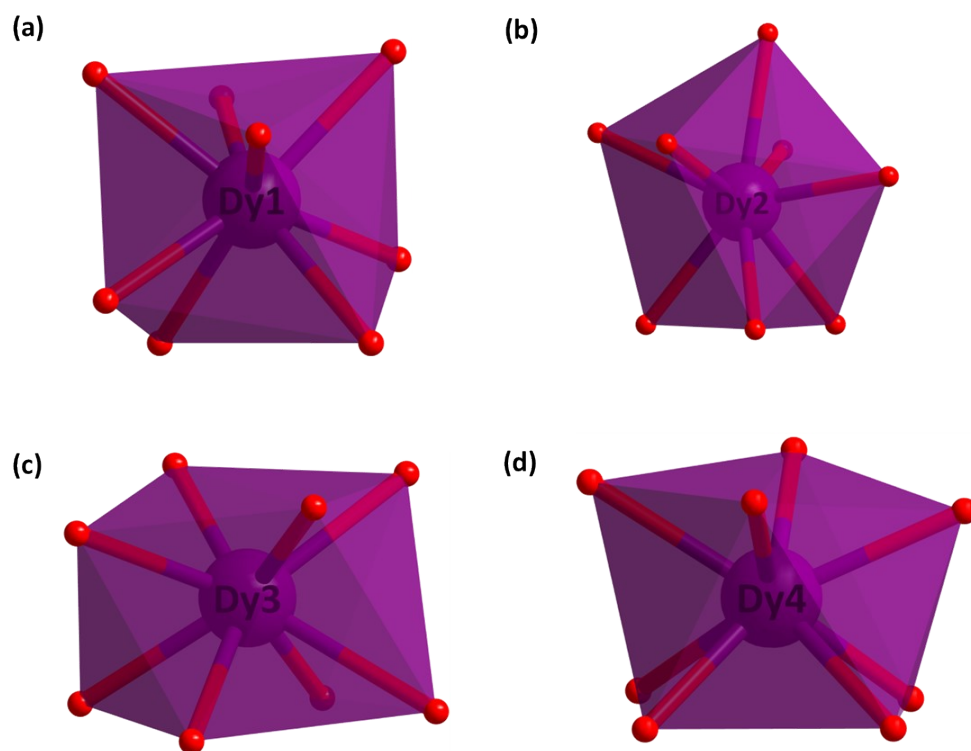

**Fig. S5** The coordination geometries of Dy atoms in compound **2-Dy**.

**Scheme S1.** Coordination modes of HIN in **2-Dy**.

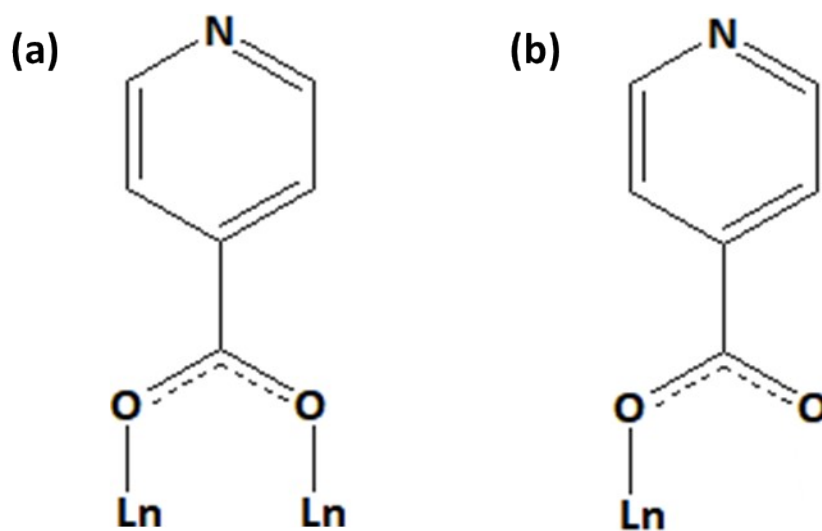

## PXRD patterns

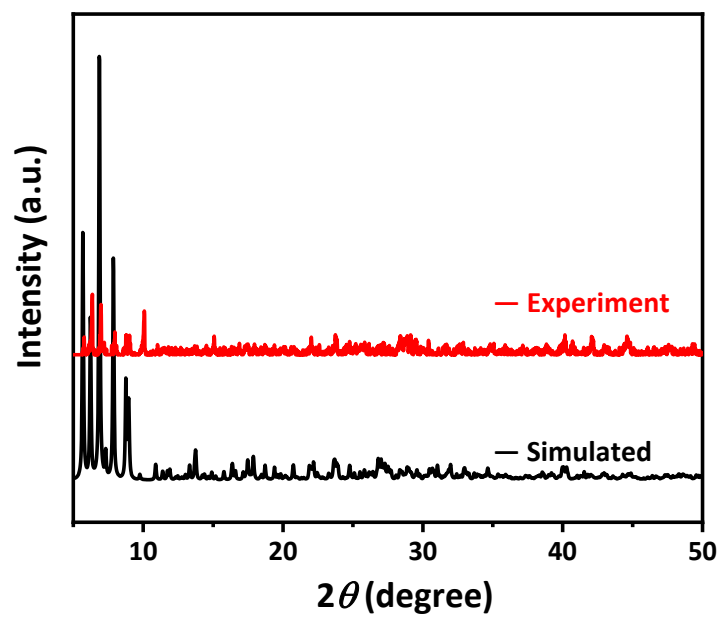

Fig. S6 The PXRD spectrum of compound 1-Gd.

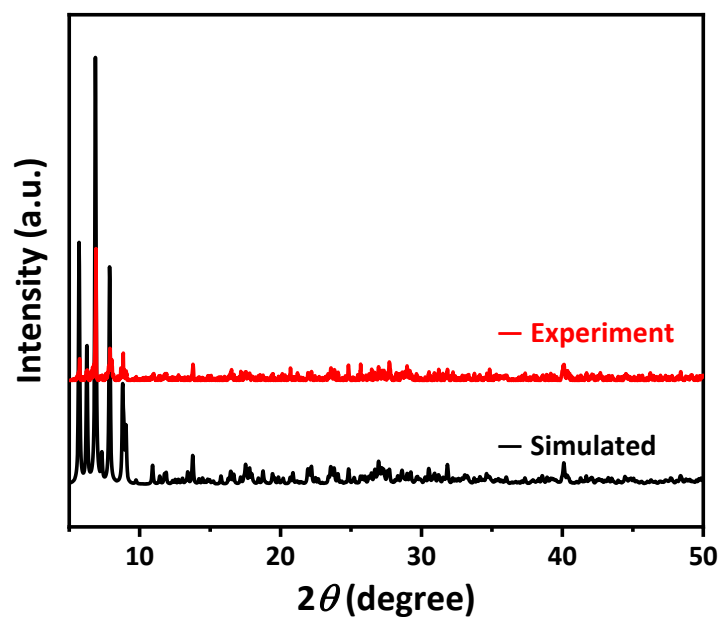

Fig. S7 The PXRD spectrum of compound 2-Dy.

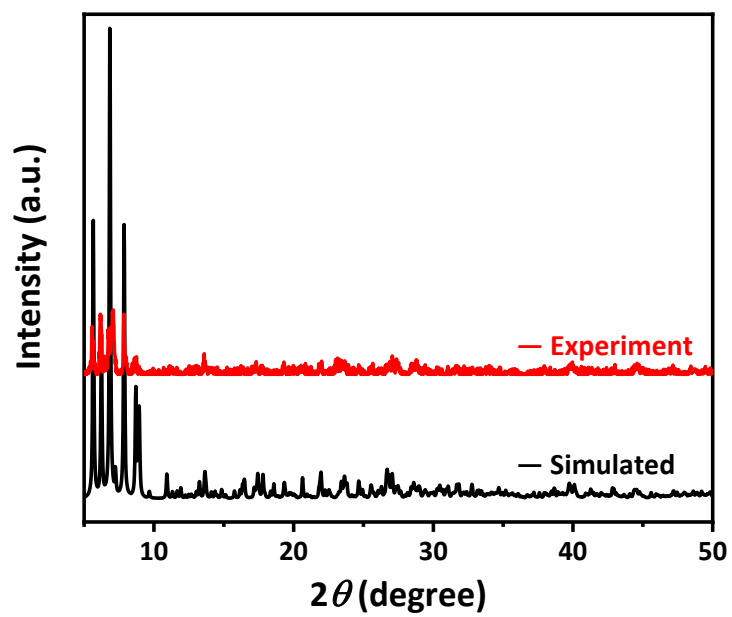

**Fig. S8** The PXRD spectrum of compound 3-Eu.

## FT-IR patterns

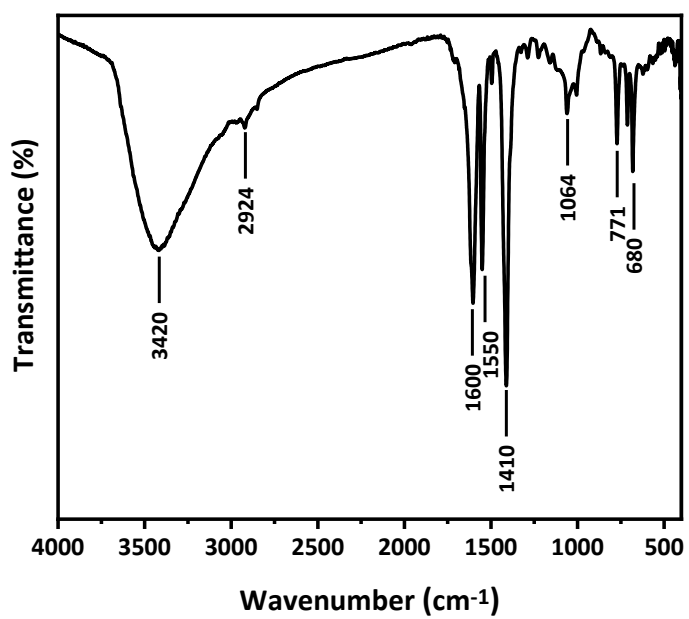

Fig. S9 The IR spectrum of compound 1-Gd.

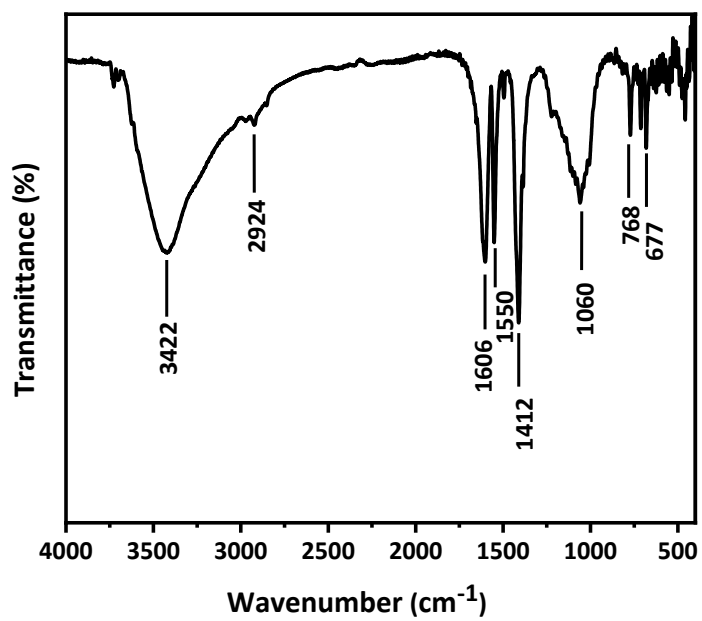

Fig. S10 The IR spectrum of compound 2-Dy.



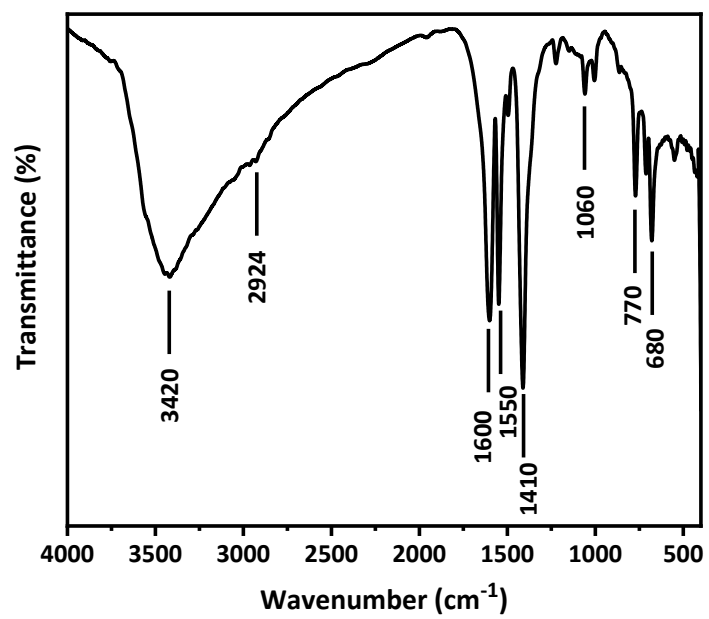

**Fig. S11** The IR spectrum of compound 3-Eu.

TG

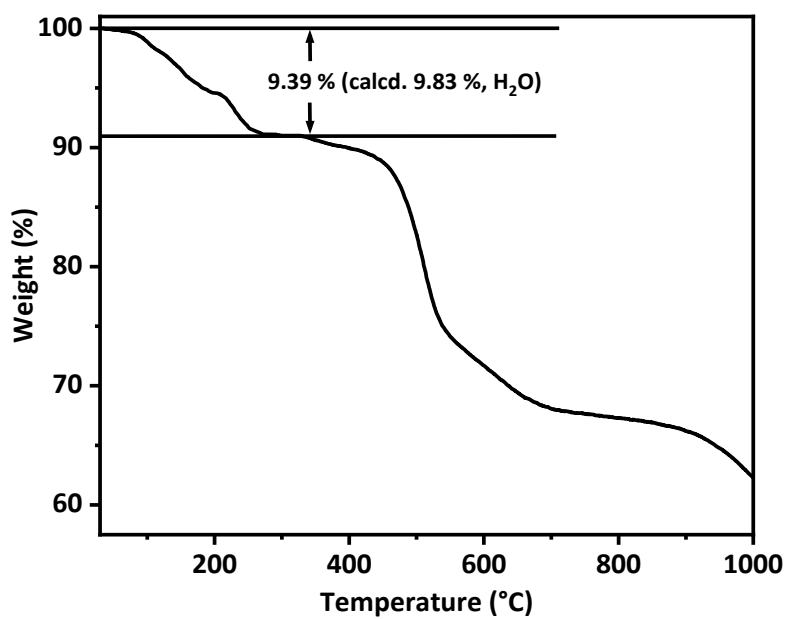

Fig. S12 TGA curve of compound 1-Gd.

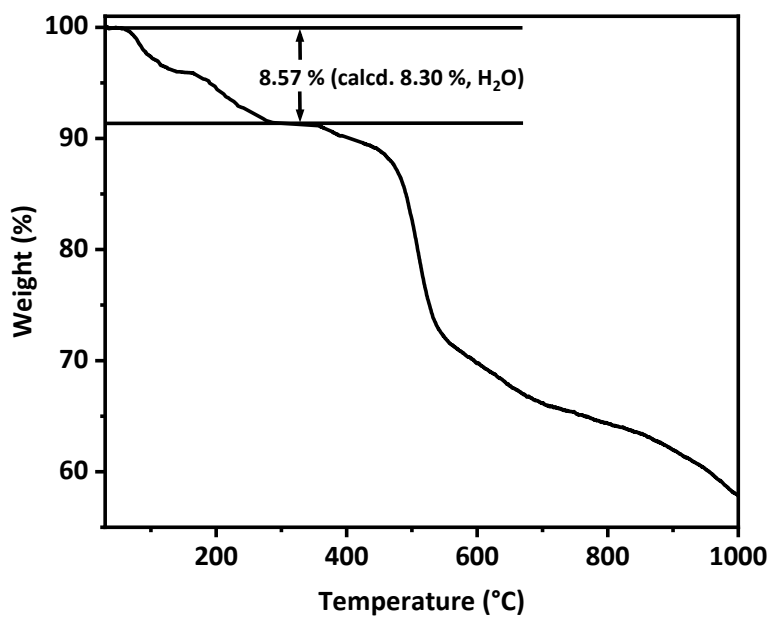

Fig. S13 TGA curve of compound 2-Dy.

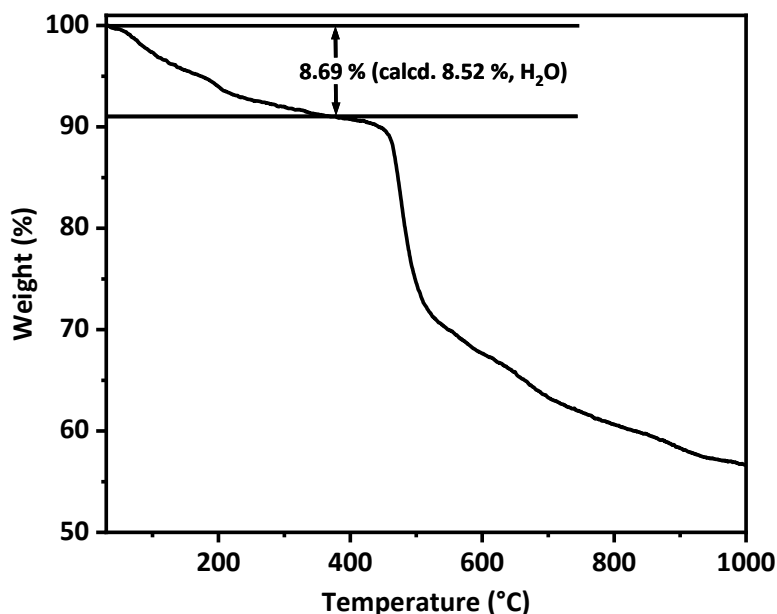

**Fig. S14** TGA curve of compound **3-Eu**.

The thermogravimetric analyses of compounds **1-Gd** and **3-Eu** were also investigated (Fig. S12 and S14). For **1-Gd**, the weight loss of 5.45 % (calculated value: 5.69 %) corresponds to the loss of lattice H<sub>2</sub>O molecules, which ranges from 25 to 190 °C. The second step in the range of 190–280 °C is considered as the the removal of coordinated H<sub>2</sub>O molecules (calculated value: 4.14 %; found: 3.94 %). When temperature increases from 280 to 1000 °C, the entire compound framework gradually collapses as the organic ligands isonicotinic acid are lost. For **3-Eu**, the loss of 4.37 % is within the scope of 25–150 °C, which may be due to the lattice H<sub>2</sub>O molecules (calculated value: 4.26 %). The loss of 4.32 % between 150 and 350 °C corresponds to the coordinated H<sub>2</sub>O molecules (calculated value: 4.26 %). Above 350 °C, HIN ligands are removed and the framework collapses.

## Magnetic property

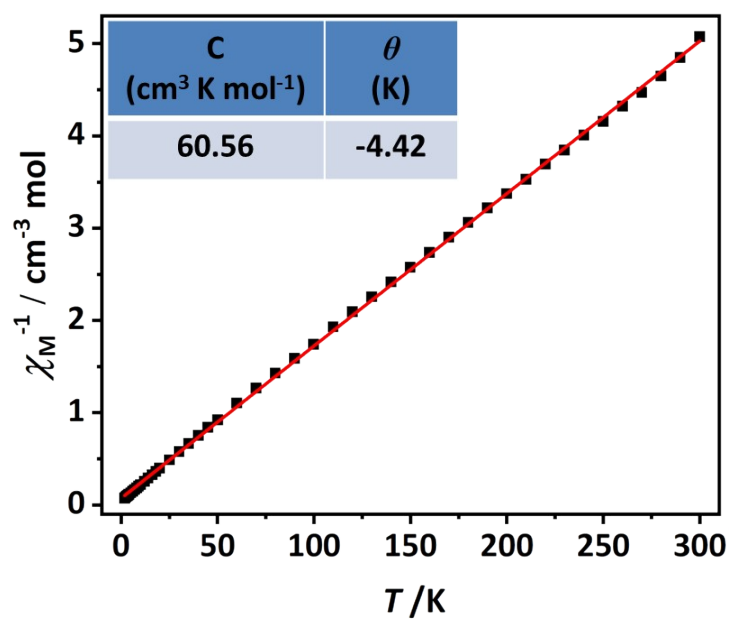

Fig. S15  $\chi_M^{-1}$  versus  $T$  plot of **1-Gd**. The red line is fitting result with  $\chi_M = C / (T - \theta)$ .

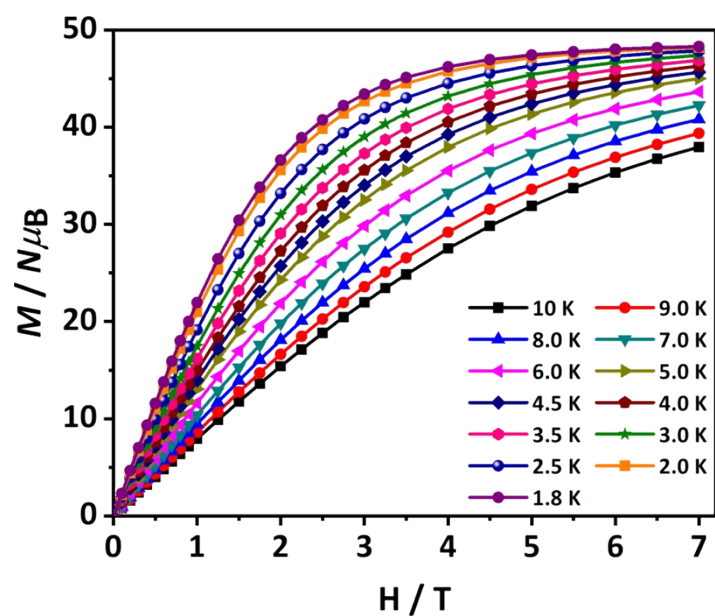

Fig. S16 Plot of  $M$ - $H$  for **1-Gd** under different temperatures.

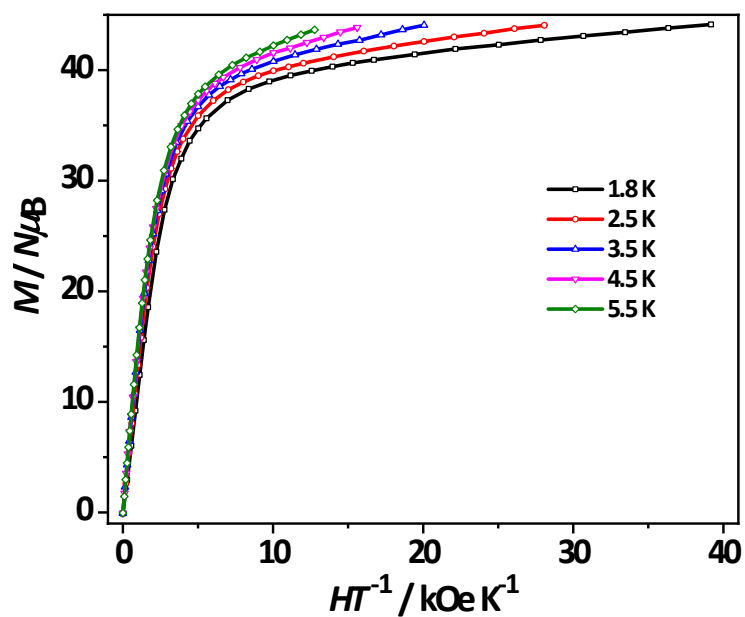

**Fig. S17** Plot of reduced magnetization ( $M$ ) vs  $HT^{-1}$  in the range of 1.8 to 5.5 K for compound **2-Dy**.

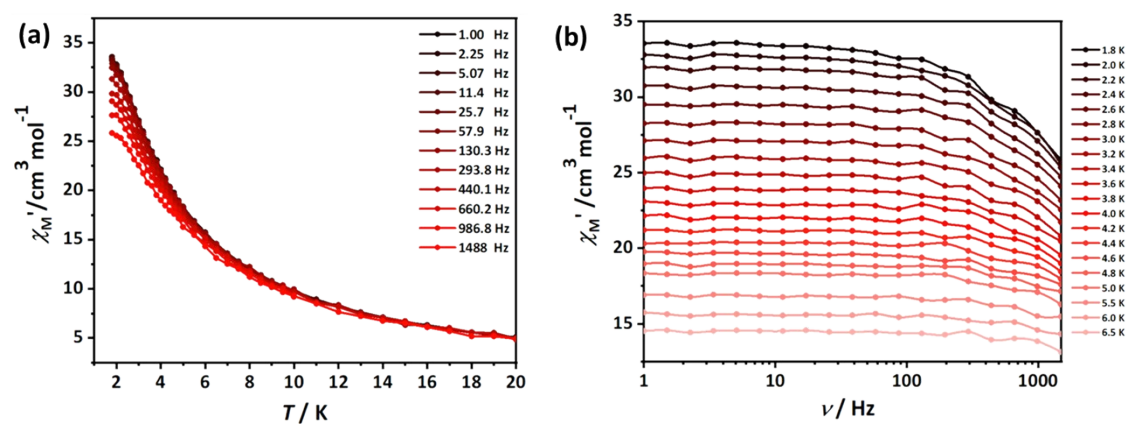

**Fig. S18** The isothermal or equifrequent lines of in-phase susceptibilities of compound **2-Dy** for the observation of frequency dependence.

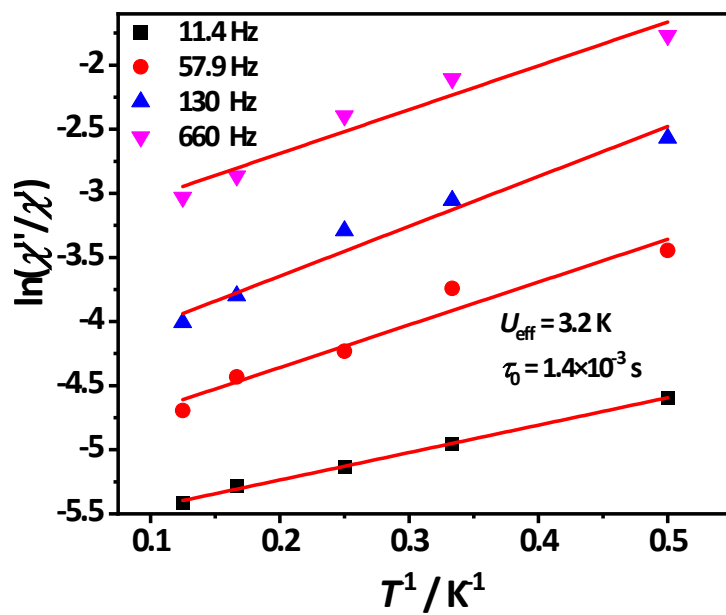

**Fig. S19** Natural logarithm of the ratio of  $\chi''$  over  $\chi'$  versus  $T^{-1}$  of the data for compound **2-Dy**.

**Table S1.** Selected Bond lengths (Å) and Bond angles (°) of main metal atoms for compound **1-Gd**.

|                       |          |                    |           |
|-----------------------|----------|--------------------|-----------|
| Gd(1)-O(4)            | 2.302(7) | Gd(2)-O(4)         | 2.279(7)  |
| Gd(1)-O(9)            | 2.368(7) | Gd(2)-O(3)         | 2.346(7)  |
| Gd(1)-O(18)#1         | 2.385(8) | Gd(2)-O(10)        | 2.356(8)  |
| Gd(1)-O(3)#1          | 2.388(7) | Gd(2)-O(14)        | 2.378(8)  |
| Gd(1)-O(2)#1          | 2.409(6) | Gd(2)-O(1)         | 2.391(7)  |
| Gd(1)-O(12)           | 2.427(7) | Gd(2)-O(13)        | 2.401(8)  |
| Gd(1)-O(21)#1         | 2.471(8) | Gd(2)-O(9)#1       | 2.426(7)  |
| Gd(1)-O(1W)           | 2.546(7) | Gd(2)-O(1W)        | 2.633(7)  |
| Gd(4)-O(2)            | 2.344(7) | Gd(3)-O(3)         | 2.339(7)  |
| Gd(4)-O(11)           | 2.355(8) | Gd(3)-O(23)        | 2.363(8)  |
| Gd(4)-O(1)            | 2.366(7) | Gd(3)-O(1)         | 2.391(7)  |
| Gd(4)-O(22)           | 2.377(7) | Gd(3)-O(19)        | 2.395(9)  |
| Gd(4)-O(20)           | 2.428(8) | Gd(3)-O(2)         | 2.419(7)  |
| Gd(4)-O(9)#1          | 2.443(7) | Gd(3)-O(15)        | 2.431(8)  |
| Gd(4)-O(4W)           | 2.447(7) | Gd(3)-O(17)        | 2.433(10) |
| Gd(4)-O(3W)           | 2.489(7) | Gd(3)-O(2W)        | 2.447(9)  |
| O(4)-Gd(1)-O(9)       | 110.5(2) | O(4)-Gd(2)-O(3)    | 105.1(2)  |
| O(4)-Gd(1)-O(18)#1    | 81.5(3)  | O(4)-Gd(2)-O(10)   | 85.9(3)   |
| O(9)-Gd(1)-O(18)#1    | 141.7(2) | O(3)-Gd(2)-O(10)   | 142.6(3)  |
| O(4)-Gd(1)-O(3)#1     | 74.2(2)  | O(4)-Gd(2)-O(14)   | 139.4(3)  |
| O(9)-Gd(1)-O(3)#1     | 68.5(2)  | O(3)-Gd(2)-O(14)   | 81.0(3)   |
| O(18)#1-Gd(1)-O(3)#1  | 81.2(3)  | O(10)-Gd(2)-O(14)  | 113.8(3)  |
| O(4)-Gd(1)-O(2)#1     | 139.0(2) | O(4)-Gd(2)-O(1)    | 146.6(2)  |
| O(9)-Gd(1)-O(2)#1     | 71.5(2)  | O(3)-Gd(2)-O(1)    | 70.7(2)   |
| O(18)#1-Gd(1)-O(2)#1  | 76.2(2)  | O(10)-Gd(2)-O(1)   | 80.6(3)   |
| O(3)#1-Gd(1)-O(2)#1   | 68.7(2)  | O(14)-Gd(2)-O(1)   | 73.7(3)   |
| O(4)-Gd(1)-O(12)      | 79.8(3)  | O(4)-Gd(2)-O(13)   | 79.7(3)   |
| O(9)-Gd(1)-O(12)      | 143.4(3) | O(3)-Gd(2)-O(13)   | 142.4(3)  |
| O(18)#1-Gd(1)-O(12)   | 73.1(3)  | O(10)-Gd(2)-O(13)  | 74.2(3)   |
| O(3)#1-Gd(1)-O(12)    | 145.7(3) | O(14)-Gd(2)-O(13)  | 73.0(3)   |
| O(2)#1-Gd(1)-O(12)    | 124.2(2) | O(1)-Gd(2)-O(13)   | 124.6(2)  |
| O(4)-Gd(1)-O(21)#1    | 145.2(3) | O(4)-Gd(2)-O(9)#1  | 77.7(2)   |
| O(9)-Gd(1)-O(21)#1    | 79.3(3)  | O(3)-Gd(2)-O(9)#1  | 68.2(3)   |
| O(18)#1-Gd(1)-O(21)#1 | 111.9(3) | O(10)-Gd(2)-O(9)#1 | 79.9(3)   |
| O(3)#1-Gd(1)-O(21)#1  | 137.8(3) | O(14)-Gd(2)-O(9)#1 | 138.3(3)  |
| O(2)#1-Gd(1)-O(21)#1  | 75.7(2)  | O(1)-Gd(2)-O(9)#1  | 70.0(2)   |
| O(12)-Gd(1)-O(21)#1   | 74.4(3)  | O(13)-Gd(2)-O(9)#1 | 146.5(3)  |
| O(4)-Gd(1)-O(1W)      | 70.4(2)  | O(4)-Gd(2)-O(1W)   | 69.1(2)   |
| O(9)-Gd(1)-O(1W)      | 78.3(2)  | O(3)-Gd(2)-O(1W)   | 74.1(2)   |
| O(18)#1-Gd(1)-O(1W)   | 138.5(2) | O(10)-Gd(2)-O(1W)  | 141.7(2)  |

---

|                     |          |                    |          |
|---------------------|----------|--------------------|----------|
| O(3)#1-Gd(1)-O(1W)  | 117.7(2) | O(14)-Gd(2)-O(1W)  | 74.5(2)  |
| O(2)#1-Gd(1)-O(1W)  | 143.9(2) | O(1)-Gd(2)-O(1W)   | 135.3(2) |
| O(12)-Gd(1)-O(1W)   | 72.4(3)  | O(13)-Gd(2)-O(1W)  | 73.2(3)  |
| O(21)#1-Gd(1)-O(1W) | 79.7(2)  | O(9)#1-Gd(2)-O(1W) | 120.0(2) |
| O(2)-Gd(4)-O(11)    | 146.9(3) | O(3)-Gd(3)-O(23)   | 140.8(3) |
| O(2)-Gd(4)-O(1)     | 72.0(2)  | O(3)-Gd(3)-O(1)    | 70.8(2)  |
| O(11)-Gd(4)-O(1)    | 80.4(3)  | O(23)-Gd(3)-O(1)   | 77.5(3)  |
| O(2)-Gd(4)-O(22)    | 95.3(3)  | O(3)-Gd(3)-O(19)   | 93.9(3)  |
| O(11)-Gd(4)-O(22)   | 94.8(3)  | O(23)-Gd(3)-O(19)  | 98.9(3)  |
| O(1)-Gd(4)-O(22)    | 75.1(3)  | O(1)-Gd(3)-O(19)   | 144.2(3) |
| O(2)-Gd(4)-O(20)    | 99.4(3)  | O(3)-Gd(3)-O(2)    | 69.4(2)  |
| O(11)-Gd(4)-O(20)   | 90.5(3)  | O(23)-Gd(3)-O(2)   | 78.8(3)  |
| O(1)-Gd(4)-O(20)    | 140.8(3) | O(1)-Gd(3)-O(2)    | 70.3(2)  |
| O(22)-Gd(4)-O(20)   | 144.0(3) | O(19)-Gd(3)-O(2)   | 74.1(3)  |
| O(2)-Gd(4)-O(9)#1   | 71.3(2)  | O(3)-Gd(3)-O(15)   | 104.5(3) |
| O(11)-Gd(4)-O(9)#1  | 82.6(3)  | O(23)-Gd(3)-O(15)  | 89.4(3)  |
| O(1)-Gd(4)-O(9)#1   | 70.1(2)  | O(1)-Gd(3)-O(15)   | 76.6(3)  |
| O(22)-Gd(4)-O(9)#1  | 145.1(3) | O(19)-Gd(3)-O(15)  | 139.2(3) |
| O(20)-Gd(4)-O(9)#1  | 70.9(3)  | O(2)-Gd(3)-O(15)   | 146.5(3) |
| O(2)-Gd(4)-O(4W)    | 73.7(3)  | O(3)-Gd(3)-O(17)   | 73.2(3)  |
| O(11)-Gd(4)-O(4W)   | 139.3(3) | O(23)-Gd(3)-O(17)  | 145.9(3) |
| O(1)-Gd(4)-O(4W)    | 132.3(3) | O(1)-Gd(3)-O(17)   | 126.0(3) |
| O(22)-Gd(4)-O(4W)   | 76.1(3)  | O(19)-Gd(3)-O(17)  | 76.0(3)  |
| O(20)-Gd(4)-O(4W)   | 76.9(3)  | O(2)-Gd(3)-O(17)   | 129.5(3) |
| O(9)#1-Gd(4)-O(4W)  | 126.8(2) | O(15)-Gd(3)-O(17)  | 75.0(4)  |
| O(2)-Gd(4)-O(3W)    | 143.4(3) | O(3)-Gd(3)-O(2W)   | 147.1(3) |
| O(11)-Gd(4)-O(3W)   | 69.6(3)  | O(23)-Gd(3)-O(2W)  | 71.7(3)  |
| O(1)-Gd(4)-O(3W)    | 135.1(2) | O(1)-Gd(3)-O(2W)   | 136.9(3) |
| O(22)-Gd(4)-O(3W)   | 75.1(3)  | O(19)-Gd(3)-O(2W)  | 71.3(3)  |
| O(20)-Gd(4)-O(3W)   | 73.6(3)  | O(2)-Gd(3)-O(2W)   | 129.6(3) |
| O(9)#1-Gd(4)-O(3W)  | 134.2(3) | O(15)-Gd(3)-O(2W)  | 73.7(3)  |
| O(4W)-Gd(4)-O(3W)   | 69.7(3)  | O(17)-Gd(3)-O(2W)  | 74.8(3)  |

---



**Table S2.** Selected Bond lengths (Å) and Bond angles (°) of main metal atoms for compound **2-Dy**.

|                     |          |                   |          |
|---------------------|----------|-------------------|----------|
| Dy(1)-O(4)          | 2.332(7) | Dy(2)-O(19)       | 2.334(6) |
| Dy(1)-O(21)         | 2.339(6) | Dy(2)-O(8)        | 2.337(7) |
| Dy(1)-O(18)         | 2.346(7) | Dy(2)-O(10)       | 2.361(7) |
| Dy(1)-O(7)          | 2.367(7) | Dy(2)-O(13)       | 2.394(7) |
| Dy(1)-O(5)          | 2.398(8) | Dy(2)-O(18)       | 2.395(6) |
| Dy(1)-O(15)#1       | 2.429(7) | Dy(2)-O(21)       | 2.402(7) |
| Dy(1)-O(23)         | 2.450(7) | Dy(2)-O(11)       | 2.434(8) |
| Dy(1)-O(22)         | 2.476(7) | Dy(2)-O(20)       | 2.437(8) |
| Dy(3)-O(17)         | 2.233(6) | Dy(4)-O(17)       | 2.272(6) |
| Dy(3)-O(19)         | 2.326(6) | Dy(4)-O(19)#1     | 2.362(6) |
| Dy(3)-O(14)         | 2.359(7) | Dy(4)-O(15)       | 2.366(6) |
| Dy(3)-O(3)          | 2.363(7) | Dy(4)-O(9)#1      | 2.368(7) |
| Dy(3)-O(18)         | 2.384(7) | Dy(4)-O(21)#1     | 2.388(7) |
| Dy(3)-O(2)          | 2.400(7) | Dy(4)-O(1)        | 2.403(7) |
| Dy(3)-O(15)#1       | 2.410(7) | Dy(4)-O(6)#1      | 2.465(7) |
| Dy(3)-O(16)         | 2.644(6) | Dy(4)-O(16)       | 2.490(7) |
| O(4)-Dy(1)-O(21)    | 147.7(2) | O(19)-Dy(2)-O(8)  | 140.7(2) |
| O(4)-Dy(1)-O(18)    | 80.8(2)  | O(19)-Dy(2)-O(10) | 94.9(2)  |
| O(21)-Dy(1)-O(18)   | 72.8(2)  | O(8)-Dy(2)-O(10)  | 97.0(3)  |
| O(4)-Dy(1)-O(7)     | 95.7(3)  | O(19)-Dy(2)-O(13) | 105.1(3) |
| O(21)-Dy(1)-O(7)    | 94.9(2)  | O(8)-Dy(2)-O(13)  | 89.7(3)  |
| O(18)-Dy(1)-O(7)    | 74.6(2)  | O(10)-Dy(2)-O(13) | 139.1(3) |
| O(4)-Dy(1)-O(5)     | 89.1(3)  | O(19)-Dy(2)-O(18) | 71.5(2)  |
| O(21)-Dy(1)-O(5)    | 99.8(3)  | O(8)-Dy(2)-O(18)  | 77.1(2)  |
| O(18)-Dy(1)-O(5)    | 141.2(2) | O(10)-Dy(2)-O(18) | 144.3(2) |
| O(7)-Dy(1)-O(5)     | 144.1(2) | O(13)-Dy(2)-O(18) | 76.5(3)  |
| O(4)-Dy(1)-O(15)#1  | 82.1(2)  | O(19)-Dy(2)-O(21) | 69.7(2)  |
| O(21)-Dy(1)-O(15)#1 | 71.9(2)  | O(8)-Dy(2)-O(21)  | 78.1(3)  |
| O(18)-Dy(1)-O(15)#1 | 70.7(2)  | O(10)-Dy(2)-O(21) | 73.5(2)  |
| O(7)-Dy(1)-O(15)#1  | 145.1(2) | O(13)-Dy(2)-O(21) | 146.9(3) |
| O(5)-Dy(1)-O(15)#1  | 70.8(2)  | O(18)-Dy(2)-O(21) | 70.8(2)  |
| O(4)-Dy(1)-O(23)    | 139.0(3) | O(19)-Dy(2)-O(11) | 72.7(3)  |
| O(21)-Dy(1)-O(23)   | 73.3(2)  | O(8)-Dy(2)-O(11)  | 146.6(3) |
| O(18)-Dy(1)-O(23)   | 132.6(2) | O(10)-Dy(2)-O(11) | 76.3(3)  |
| O(7)-Dy(1)-O(23)    | 76.5(3)  | O(13)-Dy(2)-O(11) | 76.3(3)  |
| O(5)-Dy(1)-O(23)    | 76.7(3)  | O(18)-Dy(2)-O(11) | 126.7(3) |
| O(15)#1-Dy(1)-O(23) | 126.6(2) | O(21)-Dy(2)-O(11) | 128.6(3) |
| O(4)-Dy(1)-O(22)    | 69.9(3)  | O(19)-Dy(2)-O(20) | 146.3(3) |
| O(21)-Dy(1)-O(22)   | 142.4(3) | O(8)-Dy(2)-O(20)  | 72.6(3)  |
| O(18)-Dy(1)-O(22)   | 134.6(2) | O(10)-Dy(2)-O(20) | 70.7(3)  |

---

|                     |          |                       |          |
|---------------------|----------|-----------------------|----------|
| O(7)-Dy(1)-O(22)    | 74.7(3)  | O(13)-Dy(2)-O(20)     | 73.1(3)  |
| O(5)-Dy(1)-O(22)    | 73.6(3)  | O(18)-Dy(2)-O(20)     | 136.7(3) |
| O(15)#1-Dy(1)-O(22) | 134.6(3) | O(21)-Dy(2)-O(20)     | 129.7(3) |
| O(23)-Dy(1)-O(22)   | 69.2(3)  | O(11)-Dy(2)-O(20)     | 74.3(3)  |
| O(17)-Dy(3)-O(19)   | 103.7(2) | O(17)-Dy(4)-O(19)#1   | 73.9(2)  |
| O(17)-Dy(3)-O(14)   | 138.2(3) | O(17)-Dy(4)-O(15)     | 110.4(2) |
| O(19)-Dy(3)-O(14)   | 82.0(3)  | O(19)#1-Dy(4)-O(15)   | 68.8(2)  |
| O(17)-Dy(3)-O(3)    | 86.7(3)  | O(17)-Dy(4)-O(9)#1    | 81.7(3)  |
| O(19)-Dy(3)-O(3)    | 143.2(2) | O(19)#1-Dy(4)-O(9)#1  | 81.1(3)  |
| O(14)-Dy(3)-O(3)    | 113.6(3) | O(15)-Dy(4)-O(9)#1    | 141.8(3) |
| O(17)-Dy(3)-O(18)   | 147.4(2) | O(17)-Dy(4)-O(21)#1   | 139.2(2) |
| O(19)-Dy(3)-O(18)   | 71.8(2)  | O(19)#1-Dy(4)-O(21)#1 | 69.5(2)  |
| O(14)-Dy(3)-O(18)   | 74.1(3)  | O(15)-Dy(4)-O(21)#1   | 72.2(2)  |
| O(3)-Dy(3)-O(18)    | 80.5(2)  | O(9)#1-Dy(4)-O(21)#1  | 75.6(2)  |
| O(17)-Dy(3)-O(2)    | 79.5(3)  | O(17)-Dy(4)-O(1)      | 80.1(2)  |
| O(19)-Dy(3)-O(2)    | 143.1(2) | O(19)#1-Dy(4)-O(1)    | 145.7(2) |
| O(14)-Dy(3)-O(2)    | 72.9(3)  | O(15)-Dy(4)-O(1)      | 143.2(3) |
| O(3)-Dy(3)-O(2)     | 73.1(3)  | O(9)#1-Dy(4)-O(1)     | 73.1(3)  |
| O(18)-Dy(3)-O(2)    | 124.1(2) | O(21)#1-Dy(4)-O(1)    | 123.2(2) |
| O(17)-Dy(3)-O(15)#1 | 77.9(2)  | O(17)-Dy(4)-O(6)#1    | 145.0(2) |
| O(19)-Dy(3)-O(15)#1 | 68.6(2)  | O(19)#1-Dy(4)-O(6)#1  | 138.4(2) |
| O(14)-Dy(3)-O(15)#1 | 139.3(3) | O(15)-Dy(4)-O(6)#1    | 79.7(2)  |
| O(3)-Dy(3)-O(15)#1  | 79.6(2)  | O(9)#1-Dy(4)-O(6)#1   | 111.7(3) |
| O(18)-Dy(3)-O(15)#1 | 70.4(2)  | O(21)#1-Dy(4)-O(6)#1  | 75.6(2)  |
| O(2)-Dy(3)-O(15)#1  | 145.3(3) | O(1)-Dy(4)-O(6)#1     | 73.7(3)  |
| O(17)-Dy(3)-O(16)   | 67.9(2)  | O(17)-Dy(4)-O(16)     | 70.2(2)  |
| O(19)-Dy(3)-O(16)   | 73.5(2)  | O(19)#1-Dy(4)-O(16)   | 117.3(2) |
| O(14)-Dy(3)-O(16)   | 74.6(2)  | O(15)-Dy(4)-O(16)     | 78.0(2)  |
| O(3)-Dy(3)-O(16)    | 141.4(2) | O(9)#1-Dy(4)-O(16)    | 138.7(2) |
| O(18)-Dy(3)-O(16)   | 135.7(2) | O(21)#1-Dy(4)-O(16)   | 144.2(2) |
| O(2)-Dy(3)-O(16)    | 73.9(2)  | O(1)-Dy(4)-O(16)      | 72.7(2)  |
| O(15)#1-Dy(3)-O(16) | 119.9(2) | O(6)#1-Dy(4)-O(16)    | 79.9(2)  |

---

**Table S3.** Selected Bond lengths (Å) and Bond angles (°) of main metal atoms for compound **3-Eu**.

|                      |            |                    |            |
|----------------------|------------|--------------------|------------|
| Eu(1)-O(5)           | 2.315(4)   | Eu(3)-O(9)         | 2.358(4)   |
| Eu(1)-O(4)           | 2.393(5)   | Eu(3)-O(11)        | 2.368(5)   |
| Eu(1)-O(6)           | 2.404(4)   | Eu(3)-O(3)         | 2.372(5)   |
| Eu(1)-O(8)#1         | 2.404(4)   | Eu(3)-O(12)        | 2.418(4)   |
| Eu(1)-O(9)#1         | 2.423(4)   | Eu(3)-O(19)        | 2.422(5)   |
| Eu(1)-O(7)           | 2.446(4)   | Eu(3)-O(6)#1       | 2.468(4)   |
| Eu(1)-O(18)#1        | 2.490(5)   | Eu(3)-O(1W)        | 2.499(5)   |
| Eu(1)-O(2)           | 2.533(5)   | Eu(3)-O(2W)        | 2.526(5)   |
| Eu(2)-O(5)           | 2.271(5)   | Eu(4)-O(8)         | 2.341(4)   |
| Eu(2)-O(8)           | 2.352(4)   | Eu(4)-O(13)        | 2.384(5)   |
| Eu(2)-O(10)          | 2.385(4)   | Eu(4)-O(1)#1       | 2.408(5)   |
| Eu(2)-O(14)          | 2.395(5)   | Eu(4)-O(15)        | 2.409(5)   |
| Eu(2)-O(3)           | 2.409(4)   | Eu(4)-O(3)         | 2.425(4)   |
| Eu(2)-O(20)          | 2.412(5)   | Eu(4)-O(9)         | 2.449(5)   |
| Eu(2)-O(6)#1         | 2.438(4)   | Eu(4)-O(3W)        | 2.476(5)   |
| Eu(2)-O(2)           | 2.683(4)   | Eu(4)-O(16)        | 2.483(5)   |
| O(5)-Eu(1)-O(4)      | 82.53(17)  | O(9)-Eu(3)-O(11)   | 148.38(15) |
| O(5)-Eu(1)-O(6)      | 110.39(16) | O(9)-Eu(3)-O(3)    | 72.33(14)  |
| O(4)-Eu(1)-O(6)      | 140.20(16) | O(11)-Eu(3)-O(3)   | 81.16(15)  |
| O(5)-Eu(1)-O(8)#1    | 73.88(15)  | O(9)-Eu(3)-O(12)   | 94.90(16)  |
| O(4)-Eu(1)-O(8)#1    | 81.18(17)  | O(11)-Eu(3)-O(12)  | 94.36(18)  |
| O(6)-Eu(1)-O(8)#1    | 67.76(14)  | O(3)-Eu(3)-O(12)   | 74.62(15)  |
| O(5)-Eu(1)-O(9)#1    | 138.77(16) | O(9)-Eu(3)-O(19)   | 98.96(16)  |
| O(4)-Eu(1)-O(9)#1    | 74.52(15)  | O(11)-Eu(3)-O(19)  | 90.65(18)  |
| O(6)-Eu(1)-O(9)#1    | 71.58(15)  | O(3)-Eu(3)-O(19)   | 140.73(15) |
| O(8)#1-Eu(1)-O(9)#1  | 69.15(14)  | O(12)-Eu(3)-O(19)  | 144.57(17) |
| O(5)-Eu(1)-O(7)      | 80.52(16)  | O(9)-Eu(3)-O(6)#1  | 71.53(15)  |
| O(4)-Eu(1)-O(7)      | 74.30(18)  | O(11)-Eu(3)-O(6)#1 | 83.57(15)  |
| O(6)-Eu(1)-O(7)      | 143.36(16) | O(3)-Eu(3)-O(6)#1  | 70.06(14)  |
| O(8)#1-Eu(1)-O(7)    | 146.49(15) | O(12)-Eu(3)-O(6)#1 | 144.53(15) |
| O(9)#1-Eu(1)-O(7)    | 123.58(15) | O(19)-Eu(3)-O(6)#1 | 70.89(15)  |
| O(5)-Eu(1)-O(18)#1   | 145.87(16) | O(9)-Eu(3)-O(1W)   | 73.00(15)  |
| O(4)-Eu(1)-O(18)#1   | 112.05(18) | O(11)-Eu(3)-O(1W)  | 138.62(16) |
| O(6)-Eu(1)-O(18)#1   | 78.71(15)  | O(3)-Eu(3)-O(1W)   | 131.99(16) |
| O(8)#1-Eu(1)-O(18)#1 | 136.94(14) | O(12)-Eu(3)-O(1W)  | 76.36(16)  |
| O(9)#1-Eu(1)-O(18)#1 | 75.26(15)  | O(19)-Eu(3)-O(1W)  | 76.83(18)  |
| O(7)-Eu(1)-O(18)#1   | 74.65(16)  | O(6)#1-Eu(3)-O(1W) | 126.64(14) |
| O(5)-Eu(1)-O(2)      | 70.68(15)  | O(9)-Eu(3)-O(2W)   | 141.89(15) |
| O(4)-Eu(1)-O(2)      | 140.44(15) | O(11)-Eu(3)-O(2W)  | 69.73(16)  |
| O(6)-Eu(1)-O(2)      | 77.93(14)  | O(3)-Eu(3)-O(2W)   | 136.16(14) |

---

|                    |            |                    |            |
|--------------------|------------|--------------------|------------|
| O(8)#1-Eu(1)-O(2)  | 116.68(14) | O(12)-Eu(3)-O(2W)  | 75.69(17)  |
| O(9)#1-Eu(1)-O(2)  | 143.64(14) | O(19)-Eu(3)-O(2W)  | 73.29(16)  |
| O(7)-Eu(1)-O(2)    | 73.01(16)  | O(6)#1-Eu(3)-O(2W) | 134.55(16) |
| O(18)#1-Eu(1)-O(2) | 79.82(15)  | O(1W)-Eu(3)-O(2W)  | 68.90(15)  |
| O(5)-Eu(2)-O(8)    | 104.06(16) | O(8)-Eu(4)-O(13)   | 139.39(17) |
| O(5)-Eu(2)-O(10)   | 88.47(17)  | O(8)-Eu(4)-O(1)#1  | 96.96(16)  |
| O(8)-Eu(2)-O(10)   | 141.33(16) | O(13)-Eu(4)-O(1)#1 | 96.09(18)  |
| O(5)-Eu(2)-O(14)   | 138.44(17) | O(8)-Eu(4)-O(15)   | 103.62(17) |
| O(8)-Eu(2)-O(14)   | 81.52(18)  | O(13)-Eu(4)-O(15)  | 92.00(19)  |
| O(10)-Eu(2)-O(14)  | 112.98(19) | O(1)#1-Eu(4)-O(15) | 137.38(19) |
| O(5)-Eu(2)-O(3)    | 147.27(16) | O(8)-Eu(4)-O(3)    | 70.33(14)  |
| O(8)-Eu(2)-O(3)    | 70.43(14)  | O(13)-Eu(4)-O(3)   | 76.71(16)  |
| O(10)-Eu(2)-O(3)   | 79.32(16)  | O(1)#1-Eu(4)-O(3)  | 144.19(16) |
| O(14)-Eu(2)-O(3)   | 73.87(17)  | O(15)-Eu(4)-O(3)   | 78.35(17)  |
| O(5)-Eu(2)-O(20)   | 79.33(17)  | O(8)-Eu(4)-O(9)    | 69.71(14)  |
| O(8)-Eu(2)-O(20)   | 142.43(17) | O(13)-Eu(4)-O(9)   | 77.21(17)  |
| O(10)-Eu(2)-O(20)  | 75.33(18)  | O(1)#1-Eu(4)-O(9)  | 74.30(16)  |
| O(14)-Eu(2)-O(20)  | 73.0(2)    | O(15)-Eu(4)-O(9)   | 148.00(16) |
| O(3)-Eu(2)-O(20)   | 125.36(15) | O(3)-Eu(4)-O(9)    | 69.90(14)  |
| O(5)-Eu(2)-O(6)#1  | 78.00(16)  | O(8)-Eu(4)-O(3W)   | 147.71(16) |
| O(8)-Eu(2)-O(6)#1  | 68.03(14)  | O(13)-Eu(4)-O(3W)  | 72.66(19)  |
| O(10)-Eu(2)-O(6)#1 | 79.47(16)  | O(1)#1-Eu(4)-O(3W) | 70.15(19)  |
| O(14)-Eu(2)-O(6)#1 | 138.63(18) | O(15)-Eu(4)-O(3W)  | 72.6(2)    |
| O(3)-Eu(2)-O(6)#1  | 69.99(14)  | O(3)-Eu(4)-O(3W)   | 136.45(16) |
| O(20)-Eu(2)-O(6)#1 | 146.32(17) | O(9)-Eu(4)-O(3W)   | 129.80(18) |
| O(5)-Eu(2)-O(2)    | 68.54(15)  | O(8)-Eu(4)-O(16)   | 72.20(17)  |
| O(8)-Eu(2)-O(2)    | 73.32(14)  | O(13)-Eu(4)-O(16)  | 148.41(19) |
| O(10)-Eu(2)-O(2)   | 143.98(15) | O(1)#1-Eu(4)-O(16) | 75.74(19)  |
| O(14)-Eu(2)-O(2)   | 74.15(16)  | O(15)-Eu(4)-O(16)  | 75.72(19)  |
| O(3)-Eu(2)-O(2)    | 134.32(14) | O(3)-Eu(4)-O(16)   | 127.11(16) |
| O(20)-Eu(2)-O(2)   | 73.44(15)  | O(9)-Eu(4)-O(16)   | 127.34(16) |
| O(6)#1-Eu(2)-O(2)  | 119.65(13) | O(3W)-Eu(4)-O(16)  | 75.88(19)  |

---

**Table S4.** Continuous Shape Measures Calculations for metal centers in compound **2-Dy**.<sup>3</sup>

| Metal Centers | Coordination Number | Geometries                                                                          | SHAPE calculations result with the distortion values |                             |                                            |                                        |                            |
|---------------|---------------------|-------------------------------------------------------------------------------------|------------------------------------------------------|-----------------------------|--------------------------------------------|----------------------------------------|----------------------------|
|               |                     |                                                                                     | Octagon                                              | Heptagonal pyramid          | Hexagonal bipyramid                        | Cube                                   | Square antiprism           |
| Dy1 / Dy2     | 8                   | 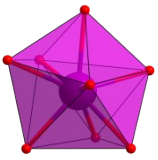   | Octagon                                              | Heptagonal pyramid          | Hexagonal bipyramid                        | Cube                                   | Square antiprism           |
|               |                     |                                                                                     | 30.961 / 30.389                                      | 24.084 / 24.138             | 16.850 / 15.046                            | 10.805 / 8.798                         | 2.430 / 2.018              |
|               |                     |                                                                                     | Triangular dodecahedron                              | Johnson-Gyrobifastigium J26 | Johnson-Elongated triangular bipyramid J14 | Johnson-Biaugmented trigonal prism J50 | Biaugmented trigonal prism |
|               |                     |                                                                                     | <b>0.455 / 0.313</b>                                 | 12.950 / 14.517             | 28.963 / 28.119                            | 2.426 / 2.279                          | 1.870 / 1.717              |
|               |                     |                                                                                     | Snub diphenoid J84                                   | Triakis tetrahedron         | Elongated trigonal bipyramid               |                                        |                            |
|               |                     |                                                                                     | 2.321 / 2.629                                        | 11.491 / 9.582              | 25.874 / 23.972                            |                                        |                            |
| Dy3 / Dy4     | 8                   |  | Octagon                                              | Heptagonal pyramid          | Hexagonal bipyramid                        | Cube                                   | Square antiprism           |
|               |                     |                                                                                     | 28.909 / 28.593                                      | 22.776 / 22.308             | 17.204 / 16.062                            | 10.439 / 9.800                         | <b>0.795 / 0.454</b>       |
|               |                     |                                                                                     | Triangular dodecahedron                              | Johnson-Gyrobifastigium J26 | Johnson-Elongated triangular bipyramid J14 | Biaugmented trigonal prism J50         | Biaugmented trigonal prism |
|               |                     |                                                                                     | 1.582 / 2.253                                        | 14.199 / 14.969             | 27.269 / 27.099                            | 1.523 / 2.400                          | 1.514 / 1.930              |
|               |                     |                                                                                     | Snub diphenoid J84                                   | Triakis tetrahedron         | Elongated trigonal bipyramid               |                                        |                            |
|               |                     |                                                                                     | 3.247 / 4.322                                        | 10.929 / 10.298             | 23.756 / 23.413                            |                                        |                            |

**Table S5.** Summary of the reported 4f and 3d-4f clusters with isonicotinic ligand.

| Compound                           | Formula                                                                                                                                                                                                                                                                                                                                                                     | Dimensionality | Ref . |
|------------------------------------|-----------------------------------------------------------------------------------------------------------------------------------------------------------------------------------------------------------------------------------------------------------------------------------------------------------------------------------------------------------------------------|----------------|-------|
| 4f                                 |                                                                                                                                                                                                                                                                                                                                                                             |                |       |
| Ln                                 | [Ln(IN)(CO <sub>3</sub> )(H <sub>2</sub> O)] (Ln = La, Eu)                                                                                                                                                                                                                                                                                                                  | 2D             | 4     |
| Ln                                 | [Ln(IN) <sub>2</sub> L] (Ln = Eu, Tb, Er, Dy, Ho, Gd, La, L = OCH <sub>2</sub> CH <sub>2</sub> OH)                                                                                                                                                                                                                                                                          | 1D             | 5     |
| Ln                                 | $\text{L}^-/\text{D}^-[\text{Ln}(\text{IN})[\text{HIN}][\text{CH}_2\text{OCH}_2\text{O}]_n$ (Ln = Gd, Dy)                                                                                                                                                                                                                                                                   | 1D             | 6     |
| Ln <sub>3</sub>                    | [Ln <sub>3</sub> (IN) <sub>2</sub> (bdc) <sub>3.5</sub> (H <sub>2</sub> O) <sub>3</sub> ]·0.5H <sub>2</sub> O (Ln = Er, Ho)                                                                                                                                                                                                                                                 | 3D             | 7     |
| Ln <sub>3</sub>                    | [Ln <sub>3</sub> (IN) <sub>3</sub> (μ <sub>3</sub> -OH)(HIDA)(IDA) <sub>2</sub> ] <sub>n</sub> (Ln = Eu, Sm)                                                                                                                                                                                                                                                                | 2D             | 8     |
| Ln <sub>26</sub>                   | [Ho <sub>26</sub> (IN) <sub>28</sub> (CH <sub>3</sub> COO) <sub>4</sub> (CO <sub>3</sub> ) <sub>10</sub> (OH) <sub>26</sub> (H <sub>2</sub> O) <sub>18</sub> ]·20H <sub>2</sub> O                                                                                                                                                                                           | 0D             | 9     |
|                                    | [Er <sub>26</sub> (IN) <sub>29</sub> (CH <sub>3</sub> COO) <sub>3</sub> (CO <sub>3</sub> ) <sub>10</sub> (OH) <sub>26</sub> (H <sub>2</sub> O) <sub>19</sub> ]·26H <sub>2</sub> O                                                                                                                                                                                           |                |       |
| Ho <sub>48</sub>                   | K <sub>2</sub> [Ho <sub>48</sub> (IN) <sub>46</sub> (μ <sub>3</sub> -OH) <sub>84</sub> (μ <sub>4</sub> -OH) <sub>4</sub> (μ <sub>5</sub> -O) <sub>2</sub> (OAc) <sub>4</sub> (H <sub>2</sub> O) <sub>14</sub> (CO <sub>3</sub> )Br <sub>2</sub> ]·2HIN·20H <sub>2</sub> O                                                                                                   | 2D             | 10    |
| Dy <sub>30</sub>                   | Dy <sub>30</sub> (IN) <sub>41</sub> (μ <sub>3</sub> -OH) <sub>24</sub> (μ <sub>3</sub> -O) <sub>6</sub> (NO <sub>3</sub> ) <sub>9</sub> (OH) <sub>3</sub> (H <sub>2</sub> O) <sub>38</sub>                                                                                                                                                                                  | 0D             | 11    |
| Dy <sub>104</sub>                  | Dy <sub>104</sub> (IN) <sub>125</sub> (μ <sub>3</sub> -OH) <sub>80</sub> (μ <sub>3</sub> -O) <sub>24</sub> (NO <sub>3</sub> ) <sub>36</sub> (OH) <sub>19</sub> (H <sub>2</sub> O) <sub>167</sub>                                                                                                                                                                            |                |       |
| 3d-4f                              |                                                                                                                                                                                                                                                                                                                                                                             |                |       |
| LnZn                               | $\text{L}^-/\text{D}^-[\text{LnZn}(\text{IN})_3(\text{C}_2\text{H}_4\text{O}_2)]_n$ (Ln = Eu, Sm, Gd)                                                                                                                                                                                                                                                                       | 3D             | 12    |
| Ln <sub>26</sub> Zn <sub>1.5</sub> | Zn <sub>1.5</sub> Dy <sub>26</sub> (IN) <sub>25</sub> (CH <sub>3</sub> COO) <sub>8</sub> (CO <sub>3</sub> ) <sub>11</sub> (OH) <sub>26</sub> (H <sub>2</sub> O) <sub>29</sub>                                                                                                                                                                                               | 3D             | 13    |
|                                    | Zn <sub>1.5</sub> Gd <sub>26</sub> (IN) <sub>26</sub> (CH <sub>3</sub> COO) <sub>7</sub> (CO <sub>3</sub> ) <sub>11</sub> (OH) <sub>26</sub> (H <sub>2</sub> O) <sub>28</sub>                                                                                                                                                                                               |                |       |
| Ln <sub>4</sub> Cu <sub>6</sub>    | Ln <sub>4</sub> (μ <sub>3</sub> -OH) <sub>2</sub> Cu <sub>6</sub> (IN) <sub>8</sub> (OAc) <sub>3</sub> (Ln = Nd, Pr)                                                                                                                                                                                                                                                        | 3D             | 14    |
| Ln <sub>2</sub> Cu <sub>5</sub>    | {[Ln <sub>2</sub> Cu <sub>5</sub> Br <sub>4</sub> (IN) <sub>7</sub> (H <sub>2</sub> O) <sub>6</sub> ]H <sub>2</sub> O} <sub>n</sub> (Ln = Eu, Gd)                                                                                                                                                                                                                           | 3D             | 15    |
| Ln <sub>2</sub> Cu <sub>4</sub>    | [Ln <sub>2</sub> Cu <sub>4</sub> Br <sub>3</sub> (IN) <sub>6</sub> (OH)(H <sub>2</sub> O) <sub>4</sub> ] <sub>n</sub> (Ln = Ho, Yb)                                                                                                                                                                                                                                         | 2D             | 16    |
| Ln <sub>6</sub> Cu <sub>10</sub>   | [Ln <sub>6</sub> (Cu <sub>4</sub> Br <sub>3</sub> )(Cu <sub>2</sub> Br) <sub>2</sub> (Cu <sub>2</sub> Br)(IN) <sub>20</sub> (H <sub>2</sub> O) <sub>12</sub> ]·2H <sub>2</sub> O (Ln = Gd, Sm, Eu)                                                                                                                                                                          | 3D             | 17    |
| Dy <sub>2</sub> Cu <sub>4</sub>    | [Dy <sub>2</sub> Cu <sub>4</sub> (IN) <sub>7</sub> (DMF) <sub>2</sub> ]·DMF                                                                                                                                                                                                                                                                                                 | 3D             | 18    |
|                                    | [Dy <sub>2</sub> Cu <sub>4</sub> (IN) <sub>7</sub> (DMA) <sub>2</sub> ]·DMA                                                                                                                                                                                                                                                                                                 |                |       |
| Ln <sub>2</sub> Cu <sub>4</sub>    | [Ln <sub>2</sub> Cu <sub>4</sub> (IN) <sub>7</sub> (DMA) <sub>2</sub> ]·DMA (Ln = Gd, Tb)                                                                                                                                                                                                                                                                                   | 3D             | 19    |
| Ln <sub>14</sub> Cu <sub>6</sub>   | [Ln <sub>14</sub> (μ <sub>6</sub> -O)(μ <sub>3</sub> -OH) <sub>20</sub> (IN) <sub>22</sub> Cu <sub>6</sub> Cl <sub>4</sub> (H <sub>2</sub> O) <sub>8</sub> ]·6H <sub>2</sub> O (Ln = Y, Gd, Dy)                                                                                                                                                                             | 3D             | 20    |
| Ln <sub>4</sub> Cr <sub>4</sub>    | $\text{L}^-/\text{D}^-[\text{Gd}_4\text{Cr}_4(\text{IN})_{10}(\mu_3\text{-OH})_4(\mu_4\text{-O})_4(\text{H}_2\text{O})_{12}] \cdot [\text{IN}]_2 \cdot 8\text{H}_2\text{O}$                                                                                                                                                                                                 | 0D             | 21    |
|                                    | $\text{L}^-/\text{D}^-[\text{Dy}_4\text{Cr}_4(\text{IN})_{11}(\mu_3\text{-OH})_4(\mu_4\text{-O})_4(\text{H}_2\text{O})_8] \cdot [\text{IN}] \cdot 1.5\text{H}_2\text{O}$                                                                                                                                                                                                    |                |       |
| Ln <sub>8</sub> Cr <sub>4</sub>    | [Ln <sub>8</sub> Cr <sub>4</sub> (IN) <sub>18</sub> (μ <sub>3</sub> -O) <sub>2</sub> (μ <sub>3</sub> -OH) <sub>6</sub> (μ <sub>4</sub> -O) <sub>4</sub> (H <sub>2</sub> O) <sub>10</sub> ]·13H <sub>2</sub> O (Ln = Gd, Tb)                                                                                                                                                 | 1D             | 22    |
| Ln <sub>52</sub> Ni <sub>52</sub>  | [Gd <sub>52</sub> Ni <sub>52</sub> (IN) <sub>8</sub> (CH <sub>3</sub> COO) <sub>6</sub> (C <sub>2</sub> O <sub>4</sub> ) <sub>2</sub> (IDA) <sub>46</sub> (μ <sub>4</sub> -O) <sub>6</sub> (μ <sub>3</sub> -O) <sub>18</sub> (μ <sub>3</sub> -OH) <sub>102</sub> (H <sub>2</sub> O) <sub>28</sub> ]·27.5H <sub>2</sub> O                                                    | 0D             | 23    |
|                                    | [Dy <sub>52</sub> Ni <sub>52</sub> (IN) <sub>4</sub> (CH <sub>3</sub> COO) <sub>9</sub> (C <sub>2</sub> O <sub>4</sub> ) <sub>2</sub> (IDA) <sub>46</sub> (NH <sub>2</sub> CH <sub>2</sub> COO) <sub>3</sub> (μ <sub>3</sub> -O) <sub>16</sub> (μ <sub>3</sub> -OH) <sub>106</sub> (μ <sub>2</sub> -OH) <sub>10</sub> (H <sub>2</sub> O) <sub>26</sub> ]·25H <sub>2</sub> O |                |       |

## References

1. Y. Liu, Y. Zhang, G. H. Hu, S. Zhou, R. Fan, Y. Yang and Y. Xu, *Chem. Eur. J.*, 2015, **21**, 10391-10399.
2. C. H. Cui, W. W. Ju, X. M. Luo, Q. F. Lin, J. P. Cao and Y. Xu, *Inorg. Chem.*, 2018, **57**, 8608-8614.
3. D. Casanova, M. Llunell, P. Alemany and S. Alvarez, *Chem. Eur. J.*, 2005, **11**, 1479-1494.
4. L. Huang, L. J. Han, D. R. Zhu, L. Chen and Y. Xu, *Inorg. Chem. Commun.*, 2012, **21**, 80-83.
5. Y. Liu, Y. Zhang, G. H. Hu, S. Zhou, R. Q. Fan, Y. L. Yang and Y. Xu, *Chem. Eur. J.*, 2015, **21**, 10391-10399.
6. N. F. Li, J. Y. Ji, W. Jiang, J. P. Cao, Y. M. Han, P. Yuan and Y. Xu, *Z. Anorg. Allg. Chem.*, 2020, **646**, 463-468.
7. L. Chen, L. Huang, D. Zhang, D. W. Yan, C. L. Wang, T. Qin, D. R. Zhu and Y. Xu, *Inorg. Chem. Commun.*, 2012, **21**, 182-185.
8. W. Xu, C. J. Zhang, H. Wang and Y. Wang, *J. Clust. Sci.*, 2017, **28**, 2005-2015.
9. L. Chen, L. Huang, C. L. Wang, J. Fu, D. Zhang, D. R. Zhu and Y. Xu, *J. Coord. Chem.*, 2012, **65**, 958-968.
10. L. Chen, J. Y. Guo, X. Xu, W. W. Ju, D. Zhang, D. R. Zhu and Y. Xu, *Chem. Commun.*, 2013, **49**, 9728-9730.
11. X. J. Gu and D. F. Xue, *Inorg. Chem.*, **46**, 3212-3216.
12. X. X. He, Y. Liu, Y. Lv, Y. Y. Dong, G. H. Hu, S. Zhou and Y. Xu, *Inorg. Chem.*, 2016, **55**, 2048-2054.
13. L. Huang, L. J. Han, W. J. Feng, L. Zheng, Z. B. Zhang, Y. Xu, Q. Chen, D. R. Zhu and S. Y. Niu, *Cryst. Growth Des.*, 2010, **10**, 2548-2552.
14. X. J. Gu and D. F. Xue, *Inorg. Chem.*, 2007, **46**, 5349-5353.
15. L. Q. Fan, J. H. Wu and Y. F. Huang, *J. Solid State Chem.*, 2011, **184**, 2472-2477.
16. L. Q. Fan, J. H. Wu and Y. F. Huang, *Z. Anorg. Allg. Chem.*, 2014, **640**, 1462-1466.
17. L. Chen, Y. Liu, D. Lou, C. D. Wei and Y. Xu, *Z. Anorg. Allg. Chem.*, 2017, **643**, 1004-1010.
18. Z. L. Wu, A. L. Gu, N. Gao, H. Y. Cui, W. M. Wang and J. Z. Cui, *Inorg. Chem.*, 2020, **59**, 15111-15119.
19. J. Ji, W. M. Wang and Y. L. Hou, *Inorg. Chem. Commun.*, 2021, **132**, 108840.
20. M. B. Zhang, J. Zhang, S. T. Zheng and G. Y. Yang, *Angew. Chem. Int. Ed.*, 2005, **44**, 1385-1388.
21. C. H. Cui, J. P. Cao, X. M. Luo, Q. F. Lin and Y. Xu, *Chem. Eur. J.*, 2018, **24**, 15295-15302.
22. Y. M. Han, N. F. Li, Y. Z. Yu, J. P. Cao, M. X. Yang, Y. L. Hong, R. K. Kang, P. Yuan and Y. Xu, *RSC Adv.*, 2020, **10**, 11365-11370.
23. Q. F. Lin, J. Li, Y. Y. Dong, G. P. Zhou, Y. Song and Y. Xu, *Dalton Trans.*, 2017, **46**, 9745-9749.
